# Supplementary material for: A novel approach to analysing the regimes of temporary streams in relation to their controls on the composition and structure of aquatic biota
Source: Copernicus journal article supplement (doi:10.5194/hess-16-3165-2012), 2012-09-06
Supplement: Supplementary file 1 [file ASFG.xls]

## Sheet: Instructions
	Procedure for preparing an Aquatic States Frequency Graph from water discharge data.
	and calculation of flow permanence (Mf) and 6-months seasonal predictability of dry periods (Sd6)
	Made by Francesc Gallart, 2012. Example data from the Vallcebre Research Catchments, IDAEA, CSIC.
	from:
	A novel approach to analyse the regimes of temporary streams in relation to their controls on composition and structure of aquatic biota.
	F. Gallart et al.
	Hydrology and Earth System Sciences
	Francesc.gallart@idaea.csic.es
	Instructions
1	Transfer monthly flow data into the 'Bulk data' spreadsheet (modify format if more than 40 years). Lacking data must be a negative value.
2	Check 'net data' and 'flow graph' spreadsheets for correct transformation of data and totals
3	Rearrange flow net data in a chronological column and transfer them into the cyan areas of 'Flow Duration" spreadsheet.
4	Copy months and flow data columns into the yellow area of 'Flow Duration' spreadsheet. Order them following ascending discharges .
5	Verify that columns E to L in the 'Flow Duration" spreadsheet cover all the data length. (statistics are prepared for up to 1000 lines)
6	verify there are blank but no odd results in columns I and K of 'Flow Duration" spreadsheet due to 0 values of discharge
7	Check the correctness of the flow duration curve graph and the lognormal fit to the data (thin blue line)
8	Select adequate thresholds as minimal discharges for aquatic states in the orange areas of 'Flow Duration" spreadsheet
9	Verify the adequacy of the thresholds looking at the corresponding triangles in the the flow duration curve
10	Check the consistency of the Aquatic States Frequency Graph in its spreadsheet
11	Graphs and metrics results are shown in the 'Aquatic States Frequency Graph' spreadsheet
	One year data
12	Include your monthly flows for the given year in the 'one year' spreadsheet / or overwrite '-999' on the existing data if you are not using this option
13	Verfiy that no odd values appear in the 'one year' results in the 'aquatic states frequency graph' spreadsheet
	It is assummed here that minimum observed flows corresponds to the threshold between 'pool' and 'dry' states
	but depending on the gauging station design, these values may correspond to the threshold betwen 'connected' and 'pool' states.
	The frequency of drier states may not be assessed using flow data.
	After results or from field observations, update thresholds for aquatic states in the orange areas of 'Flow Duration" spreadsheet (Step 8)

## Sheet: Bulk data
Can Vila (Vallcebre)	Oct	Nov	Dec	Jan	Feb	Mar	Apr	May	Jun	Jul	Aug	Sep
1994/1995	-9999	-9999	-9999	-9999	-9999	-9999	-9999	-9999	0.00534747	0.00102886	0.0139057	0.0101541
1995/1996	0.0018132	0.00356135	0.0448624	0.0696411	0.0131196	0.0033029	0.00777709	0.0138889	0.00311497	0.000956262	0.000717636	0.000859929
1996/1997	0.00426027	0.0377314	0.0286117	0.0352237	0.0113069	0.00291806	0.00166875	0.00127115	0.0107118	0.0036096	0.00640033	0.00157647
1997/1998	0.000691085	0.00373723	0.0281673	0.00456361	0.00698936	0.0018263	0.00235011	0.00256511	0.00151676	0.000317192	0.000332445	0.000254861
1998/1999	0.000514014	0.000307909	0.00146237	0.00303056	0.00369004	0.00534829	0.0047177	0.0165424	0.00179187	0.000279763	0.000857895	0.0119445
1999/2000	0.00687372	0.0231878	0.00192184	0.00142532	0.000616973	0.0007735	0.0119012	0.00237159	0.000742162	6.63508e-05	0	0.000355566
2000/2001	0.000531158	0.00479478	0.0210514	0.00986999	0.00270107	0.0161242	0.00224325	0.00471543	0.00144918	0.000345159	4.00465e-05	7.49665e-05
2001/2002	0.000217663	0.00185071	0.000507942	0.00112203	0.000913351	0.00107021	0.0192258	0.00844772	0.00433128	0.000123397	0.000121763	0.000421788
2002/2003	0.00463451	0.0116997	0.00606267	0.00298381	0.0138564	0.0090894	0.00364927	0.0014115	0.000178625	0.000571667	0	9.79705e-05
2003/2004	0.00347562	0.0108058	0.01554	0.00128206	0.00393339	0.00937184	0.0150407	0.00828033	0.00113985	0.000168601	0.00172403	0.0004271
2004/2005	0.000463487	0.000387988	0.00121862	0.000376556	8.34554e-05	0.000730809	0.00163746	0.00107435	0.000493241	8.35725e-05	0.000313539	0.000434561
2005/2006	0.015044	0.0091371	0.00389432	0.00900396	0.0174229	0.0157892	0.00816829	0.00191317	0.00040933	2.743e-06	2.25549e-06	0.000280239
2006/2007	0.000147739	4.75367e-05	0.000179849	6.98157e-05	0.000238381	0.000228817	0.00934969	0.00390107	0.000137644	0	0	0
2007/2008	0	0	0	0	7.00245e-05	0	0.0027626	0.0192414	0.0107846	0.00194292	4.17622e-06	0
	-999	-999	-999	-999	-999	-999	-999	-999	-999	-999	-999	-999
	-999	-999	-999	-999	-999	-999	-999	-999	-999	-999	-999	-999
	-999	-999	-999	-999	-999	-999	-999	-999	-999	-999	-999	-999
	-999	-999	-999	-999	-999	-999	-999	-999	-999	-999	-999	-999
	-999	-999	-999	-999	-999	-999	-999	-999	-999	-999	-999	-999
	-999	-999	-999	-999	-999	-999	-999	-999	-999	-999	-999	-999
	-999	-999	-999	-999	-999	-999	-999	-999	-999	-999	-999	-999
	-999	-999	-999	-999	-999	-999	-999	-999	-999	-999	-999	-999
	-999	-999	-999	-999	-999	-999	-999	-999	-999	-999	-999	-999
	-999	-999	-999	-999	-999	-999	-999	-999	-999	-999	-999	-999
	-999	-999	-999	-999	-999	-999	-999	-999	-999	-999	-999	-999
	-999	-999	-999	-999	-999	-999	-999	-999	-999	-999	-999	-999
	-999	-999	-999	-999	-999	-999	-999	-999	-999	-999	-999	-999
	-999	-999	-999	-999	-999	-999	-999	-999	-999	-999	-999	-999
	-999	-999	-999	-999	-999	-999	-999	-999	-999	-999	-999	-999
	-999	-999	-999	-999	-999	-999	-999	-999	-999	-999	-999	-999
	-999	-999	-999	-999	-999	-999	-999	-999	-999	-999	-999	-999
	-999	-999	-999	-999	-999	-999	-999	-999	-999	-999	-999	-999
	-999	-999	-999	-999	-999	-999	-999	-999	-999	-999	-999	-999
	-999	-999	-999	-999	-999	-999	-999	-999	-999	-999	-999	-999
	-999	-999	-999	-999	-999	-999	-999	-999	-999	-999	-999	-999
	-999	-999	-999	-999	-999	-999	-999	-999	-999	-999	-999	-999
	-999	-999	-999	-999	-999	-999	-999	-999	-999	-999	-999	-999
	-999	-999	-999	-999	-999	-999	-999	-999	-999	-999	-999	-999
	-999	-999	-999	-999	-999	-999	-999	-999	-999	-999	-999	-999
	-999	-999	-999	-999	-999	-999	-999	-999	-999	-999	-999	-999
	-999	-999	-999	-999	-999	-999	-999	-999	-999	-999	-999	-999
m3 sec-1

## Sheet: net data
Can Vila (Vallcebre)	Oct	Nov	Dec	Jan	Feb	Mar	Apr	May	Jun	Jul	Aug	Sep
1994/1995	-	-	-	-	-	-	-	-	0.00534747	0.00102886	0.0139057	0.0101541
1995/1996	0.0018132	0.00356135	0.0448624	0.0696411	0.0131196	0.0033029	0.00777709	0.0138889	0.00311497	0.000956262	0.000717636	0.000859929
1996/1997	0.00426027	0.0377314	0.0286117	0.0352237	0.0113069	0.00291806	0.00166875	0.00127115	0.0107118	0.0036096	0.00640033	0.00157647
1997/1998	0.000691085	0.00373723	0.0281673	0.00456361	0.00698936	0.0018263	0.00235011	0.00256511	0.00151676	0.000317192	0.000332445	0.000254861
1998/1999	0.000514014	0.000307909	0.00146237	0.00303056	0.00369004	0.00534829	0.0047177	0.0165424	0.00179187	0.000279763	0.000857895	0.0119445
1999/2000	0.00687372	0.0231878	0.00192184	0.00142532	0.000616973	0.0007735	0.0119012	0.00237159	0.000742162	6.63508e-05	0	0.000355566
2000/2001	0.000531158	0.00479478	0.0210514	0.00986999	0.00270107	0.0161242	0.00224325	0.00471543	0.00144918	0.000345159	4.00465e-05	7.49665e-05
2001/2002	0.000217663	0.00185071	0.000507942	0.00112203	0.000913351	0.00107021	0.0192258	0.00844772	0.00433128	0.000123397	0.000121763	0.000421788
2002/2003	0.00463451	0.0116997	0.00606267	0.00298381	0.0138564	0.0090894	0.00364927	0.0014115	0.000178625	0.000571667	0	9.79705e-05
2003/2004	0.00347562	0.0108058	0.01554	0.00128206	0.00393339	0.00937184	0.0150407	0.00828033	0.00113985	0.000168601	0.00172403	0.0004271
2004/2005	0.000463487	0.000387988	0.00121862	0.000376556	8.34554e-05	0.000730809	0.00163746	0.00107435	0.000493241	8.35725e-05	0.000313539	0.000434561
2005/2006	0.015044	0.0091371	0.00389432	0.00900396	0.0174229	0.0157892	0.00816829	0.00191317	0.00040933	2.743e-06	2.25549e-06	0.000280239
2006/2007	0.000147739	4.75367e-05	0.000179849	6.98157e-05	0.000238381	0.000228817	0.00934969	0.00390107	0.000137644	0	0	0
2007/2008	0	0	0	0	7.00245e-05	0	0.0027626	0.0192414	0.0107846	0.00194292	4.17622e-06	0
0	-	-	-	-	-	-	-	-	-	-	-	-
0	-	-	-	-	-	-	-	-	-	-	-	-
0	-	-	-	-	-	-	-	-	-	-	-	-
0	-	-	-	-	-	-	-	-	-	-	-	-
0	-	-	-	-	-	-	-	-	-	-	-	-
0	-	-	-	-	-	-	-	-	-	-	-	-
0	-	-	-	-	-	-	-	-	-	-	-	-
0	-	-	-	-	-	-	-	-	-	-	-	-
0	-	-	-	-	-	-	-	-	-	-	-	-
0	-	-	-	-	-	-	-	-	-	-	-	-
0	-	-	-	-	-	-	-	-	-	-	-	-
0	-	-	-	-	-	-	-	-	-	-	-	-
0	-	-	-	-	-	-	-	-	-	-	-	-
0	-	-	-	-	-	-	-	-	-	-	-	-
0	-	-	-	-	-	-	-	-	-	-	-	-
0	-	-	-	-	-	-	-	-	-	-	-	-
0	-	-	-	-	-	-	-	-	-	-	-	-
0	-	-	-	-	-	-	-	-	-	-	-	-
0	-	-	-	-	-	-	-	-	-	-	-	-
0	-	-	-	-	-	-	-	-	-	-	-	-
0	-	-	-	-	-	-	-	-	-	-	-	-
0	-	-	-	-	-	-	-	-	-	-	-	-
0	-	-	-	-	-	-	-	-	-	-	-	-
0	-	-	-	-	-	-	-	-	-	-	-	-
0	-	-	-	-	-	-	-	-	-	-	-	-
0	-	-	-	-	-	-	-	-	-	-	-	-
0	-	-	-	-	-	-	-	-	-	-	-	-
m3 sec-1
num	13	13	13	13	13	13	13	13	14	14	14	14
avg	0.00297434	0.00824994	0.0118062	0.010661	0.00576475	0.00512104	0.00696091	0.00658647	0.00301063	0.000678293	0.00174427	0.00192015
min	0	0	0	0	7.00245e-05	0	0.00163746	0.00107435	0.000137644	0	0	0
max	0.015044	0.0377314	0.0448624	0.0696411	0.0174229	0.0161242	0.0192258	0.0192414	0.0107846	0.0036096	0.0139057	0.0119445

## Sheet: one year
Can Vila (Vallcebre)	Oct	Nov	Dec	Jan	Feb	Mar	Apr	May	Jun	Jul	Aug	Sep
2009-2010	0.00533197	0.002797	0.00432617	0.00499159	0.00535251	0.0124895	0.00522133	0.0083788	0.0106376	0.0147672	0.00603923	0.00290976

## Sheet: Flow Duration
month	Q m3s-1		month	Q m3s-1 ordered	exceed. freq	exceed. freq>0	lognorm	ln(Q)	Flow statistics
									number Q	160		Basin	Llobregat
1995-06-01	0.00534747		2000-08-01	0	0.993789				number Q>0	149		Stream	Vallcebre
1995-07-01	0.00102886		2003-08-01	0	0.987578				mean (ln(Q))	-6.39216		Station	Can Vila
1995-08-01	0.0139057		2007-07-01	0	0.981366				sdev (ln(Q))	1.91136		Code
1995-09-01	0.0101541		2007-08-01	0	0.975155							UTM X
1995-10-01	0.0018132		2007-09-01	0	0.968944							UTM Y
1995-11-01	0.00356135		2007-10-01	0	0.962733							Area	0.46 km2
1995-12-01	0.0448624		2007-11-01	0	0.956522							T units	month
1996-01-01	0.0696411		2007-12-01	0	0.950311							Q units	m3/s
1996-02-01	0.0131196		2008-01-01	0	0.944099
1996-03-01	0.0033029		2008-03-01	0	0.937888				Discharge thresholds		Q m3s-1	Exc. Frequency
1996-04-01	0.00777709		2008-09-01	0	0.931677					min	0	0.931677
1996-05-01	0.0138889		2006-08-01	2.25549e-06	0.925466	0.993333	1.47794e-05	-13.0021	min flow for:	Arheic	5e-05	0.900621
1996-06-01	0.00311497		2006-07-01	2.743e-06	0.919255	0.986667	2.42177e-05	-12.8065	min flow for:	Oligorheic	0.00035	0.745342
1996-07-01	0.000956262		2008-08-01	4.17622e-06	0.913043	0.98	3.30459e-05	-12.3861	min flow for:	Eurheic	0.001	0.602484
1996-08-01	0.000717636		2001-08-01	4.00465e-05	0.906832	0.973333	4.16873e-05	-10.1255	min flow for:	Hyperrheic	0.02	0.0559006
1996-09-01	0.000859929		2006-11-01	4.75367e-05	0.900621	0.966667	5.03037e-05	-9.95401		max	0.0696411	0.00621118
1996-10-01	0.00426027		2000-07-01	6.63508e-05	0.89441	0.96	5.89777e-05	-9.62055
1996-11-01	0.0377314		2007-01-01	6.98157e-05	0.888199	0.953333	6.77588e-05	-9.56965
1996-12-01	0.0286117		2008-02-01	7.00245e-05	0.881988	0.946667	7.66801e-05	-9.56667
1997-01-01	0.0352237		2001-09-01	7.49665e-05	0.875776	0.94	8.57657e-05	-9.49847
1997-02-01	0.0113069		2005-02-01	8.34554e-05	0.869565	0.933333	9.50341e-05	-9.3912
1997-03-01	0.00291806		2005-07-01	8.35725e-05	0.863354	0.926667	0.0001045	-9.3898
1997-04-01	0.00166875		2003-09-01	9.79705e-05	0.857143	0.92	0.000114177	-9.23084
1997-05-01	0.00127115		2002-08-01	0.000121763	0.850932	0.913333	0.000124077	-9.01343
1997-06-01	0.0107118		2002-07-01	0.000123397	0.84472	0.906667	0.000134208	-9.0001
1997-07-01	0.0036096		2007-06-01	0.000137644	0.838509	0.9	0.000144582	-8.89084
1997-08-01	0.00640033		2006-10-01	0.000147739	0.832298	0.893333	0.000155206	-8.82006
1997-09-01	0.00157647		2004-07-01	0.000168601	0.826087	0.886667	0.000166091	-8.68797
1997-10-01	0.000691085		2003-06-01	0.000178625	0.819876	0.88	0.000177244	-8.63022
1997-11-01	0.00373723		2006-12-01	0.000179849	0.813665	0.873333	0.000188675	-8.62339
1997-12-01	0.0281673		2001-10-01	0.000217663	0.807453	0.866667	0.00020039	-8.43256
1998-01-01	0.00456361		2007-03-01	0.000228817	0.801242	0.86	0.0002124	-8.38259
1998-02-01	0.00698936		2007-02-01	0.000238381	0.795031	0.853333	0.000224713	-8.34164
1998-03-01	0.0018263		1998-09-01	0.000254861	0.78882	0.846667	0.000237337	-8.27479
1998-04-01	0.00235011		1999-07-01	0.000279763	0.782609	0.84	0.000250281	-8.18157
1998-05-01	0.00256511		2006-09-01	0.000280239	0.776398	0.833333	0.000263555	-8.17987
1998-06-01	0.00151676		1998-11-01	0.000307909	0.770186	0.826667	0.000277167	-8.08571
1998-07-01	0.000317192		2005-08-01	0.000313539	0.763975	0.82	0.000291127	-8.06759
1998-08-01	0.000332445		1998-07-01	0.000317192	0.757764	0.813333	0.000305445	-8.056
1998-09-01	0.000254861		1998-08-01	0.000332445	0.751553	0.806667	0.000320131	-8.00904
1998-10-01	0.000514014		2001-07-01	0.000345159	0.745342	0.8	0.000335195	-7.9715
1998-11-01	0.000307909		2000-09-01	0.000355566	0.73913	0.793333	0.000350647	-7.9418
1998-12-01	0.00146237		2005-01-01	0.000376556	0.732919	0.786667	0.000366499	-7.88444
1999-01-01	0.00303056		2004-11-01	0.000387988	0.726708	0.78	0.000382762	-7.85454
1999-02-01	0.00369004		2006-06-01	0.00040933	0.720497	0.773333	0.000399447	-7.80099
1999-03-01	0.00534829		2002-09-01	0.000421788	0.714286	0.766667	0.000416567	-7.77101
1999-04-01	0.0047177		2004-09-01	0.0004271	0.708075	0.76	0.000434134	-7.75849
1999-05-01	0.0165424		2005-09-01	0.000434561	0.701863	0.753333	0.000452161	-7.74117
1999-06-01	0.00179187		2004-10-01	0.000463487	0.695652	0.746667	0.000470661	-7.67673
1999-07-01	0.000279763		2005-06-01	0.000493241	0.689441	0.74	0.000489649	-7.61451
1999-08-01	0.000857895		2001-12-01	0.000507942	0.68323	0.733333	0.000509137	-7.58514
1999-09-01	0.0119445		1998-10-01	0.000514014	0.677019	0.726667	0.000529142	-7.57326
1999-10-01	0.00687372		2000-10-01	0.000531158	0.670807	0.72	0.000549678	-7.54045
1999-11-01	0.0231878		2003-07-01	0.000571667	0.664596	0.713333	0.000570762	-7.46695
1999-12-01	0.00192184		2000-02-01	0.000616973	0.658385	0.706667	0.00059241	-7.39069
2000-01-01	0.00142532		1997-10-01	0.000691085	0.652174	0.7	0.000614639	-7.27725
2000-02-01	0.000616973		1996-08-01	0.000717636	0.645963	0.693333	0.000637467	-7.23955
2000-03-01	0.0007735		2005-03-01	0.000730809	0.639752	0.686667	0.000660913	-7.22136
2000-04-01	0.0119012		2000-06-01	0.000742162	0.63354	0.68	0.000684996	-7.20594
2000-05-01	0.00237159		2000-03-01	0.0007735	0.627329	0.673333	0.000709735	-7.16458
2000-06-01	0.000742162		1999-08-01	0.000857895	0.621118	0.666667	0.000735153	-7.06103
2000-07-01	6.63508e-05		1996-09-01	0.000859929	0.614907	0.66	0.00076127	-7.05866
2000-08-01	0		2002-02-01	0.000913351	0.608696	0.653333	0.000788109	-6.99839
2000-09-01	0.000355566		1996-07-01	0.000956262	0.602484	0.646667	0.000815693	-6.95248
2000-10-01	0.000531158		1995-07-01	0.00102886	0.596273	0.64	0.000844048	-6.8793
2000-11-01	0.00479478		2002-03-01	0.00107021	0.590062	0.633333	0.000873198	-6.8399
2000-12-01	0.0210514		2005-05-01	0.00107435	0.583851	0.626667	0.000903171	-6.83604
2001-01-01	0.00986999		2002-01-01	0.00112203	0.57764	0.62	0.000933994	-6.79261
2001-02-01	0.00270107		2004-06-01	0.00113985	0.571429	0.613333	0.000965695	-6.77686
2001-03-01	0.0161242		2004-12-01	0.00121862	0.565217	0.606667	0.000998306	-6.71004
2001-04-01	0.00224325		1997-05-01	0.00127115	0.559006	0.6	0.00103186	-6.66783
2001-05-01	0.00471543		2004-01-01	0.00128206	0.552795	0.593333	0.00106638	-6.65929
2001-06-01	0.00144918		2003-05-01	0.0014115	0.546584	0.586667	0.00110192	-6.5631
2001-07-01	0.000345159		2000-01-01	0.00142532	0.540373	0.58	0.00113849	-6.55336
2001-08-01	4.00465e-05		2001-06-01	0.00144918	0.534161	0.573333	0.00117616	-6.53676
2001-09-01	7.49665e-05		1998-12-01	0.00146237	0.52795	0.566667	0.00121494	-6.52769
2001-10-01	0.000217663		1998-06-01	0.00151676	0.521739	0.56	0.00125488	-6.49118
2001-11-01	0.00185071		1997-09-01	0.00157647	0.515528	0.553333	0.00129603	-6.45257
2001-12-01	0.000507942		2005-04-01	0.00163746	0.509317	0.546667	0.00133844	-6.41461
2002-01-01	0.00112203		1997-04-01	0.00166875	0.503106	0.54	0.00138214	-6.39568
2002-02-01	0.000913351		2004-08-01	0.00172403	0.496894	0.533333	0.00142719	-6.36309
2002-03-01	0.00107021		1999-06-01	0.00179187	0.490683	0.526667	0.00147365	-6.3245
2002-04-01	0.0192258		1995-10-01	0.0018132	0.484472	0.52	0.00152156	-6.31266
2002-05-01	0.00844772		1998-03-01	0.0018263	0.478261	0.513333	0.00157099	-6.30546
2002-06-01	0.00433128		2001-11-01	0.00185071	0.47205	0.506667	0.00162199	-6.29219
2002-07-01	0.000123397		2006-05-01	0.00191317	0.465839	0.5	0.00167464	-6.25899
2002-08-01	0.000121763		1999-12-01	0.00192184	0.459627	0.493333	0.001729	-6.25447
2002-09-01	0.000421788		2008-07-01	0.00194292	0.453416	0.486667	0.00178513	-6.24356
2002-10-01	0.00463451		2001-04-01	0.00224325	0.447205	0.48	0.00184312	-6.09983
2002-11-01	0.0116997		1998-04-01	0.00235011	0.440994	0.473333	0.00190305	-6.05329
2002-12-01	0.00606267		2000-05-01	0.00237159	0.434783	0.466667	0.00196499	-6.0442
2003-01-01	0.00298381		1998-05-01	0.00256511	0.428571	0.46	0.00202904	-5.96575
2003-02-01	0.0138564		2001-02-01	0.00270107	0.42236	0.453333	0.0020953	-5.91411
2003-03-01	0.0090894		2008-04-01	0.0027626	0.416149	0.446667	0.00216385	-5.89158
2003-04-01	0.00364927		1997-03-01	0.00291806	0.409938	0.44	0.00223481	-5.83684
2003-05-01	0.0014115		2003-01-01	0.00298381	0.403727	0.433333	0.00230829	-5.81456
2003-06-01	0.000178625		1999-01-01	0.00303056	0.397516	0.426667	0.0023844	-5.79901
2003-07-01	0.000571667		1996-06-01	0.00311497	0.391304	0.42	0.00246327	-5.77153
2003-08-01	0		1996-03-01	0.0033029	0.385093	0.413333	0.00254504	-5.71296
2003-09-01	9.79705e-05		2003-10-01	0.00347562	0.378882	0.406667	0.00262984	-5.66198
2003-10-01	0.00347562		1995-11-01	0.00356135	0.372671	0.4	0.00271784	-5.63762
2003-11-01	0.0108058		1997-07-01	0.0036096	0.36646	0.393333	0.00280918	-5.62416
2003-12-01	0.01554		2003-04-01	0.00364927	0.360248	0.386667	0.00290404	-5.61323
2004-01-01	0.00128206		1999-02-01	0.00369004	0.354037	0.38	0.00300261	-5.60212
2004-02-01	0.00393339		1997-11-01	0.00373723	0.347826	0.373333	0.00310508	-5.58941
2004-03-01	0.00937184		2005-12-01	0.00389432	0.341615	0.366667	0.00321167	-5.54824
2004-04-01	0.0150407		2007-05-01	0.00390107	0.335404	0.36	0.00332259	-5.54651
2004-05-01	0.00828033		2004-02-01	0.00393339	0.329193	0.353333	0.00343808	-5.53825
2004-06-01	0.00113985		1996-10-01	0.00426027	0.322981	0.346667	0.00355842	-5.45842
2004-07-01	0.000168601		2002-06-01	0.00433128	0.31677	0.34	0.00368387	-5.44189
2004-08-01	0.00172403		1998-01-01	0.00456361	0.310559	0.333333	0.00381475	-5.38964
2004-09-01	0.0004271		2002-10-01	0.00463451	0.304348	0.326667	0.00395136	-5.37423
2004-10-01	0.000463487		2001-05-01	0.00471543	0.298137	0.32	0.00409407	-5.35692
2004-11-01	0.000387988		1999-04-01	0.0047177	0.291925	0.313333	0.00424326	-5.35643
2004-12-01	0.00121862		2000-11-01	0.00479478	0.285714	0.306667	0.00439932	-5.34023
2005-01-01	0.000376556		1995-06-01	0.00534747	0.279503	0.3	0.00456271	-5.23113
2005-02-01	8.34554e-05		1999-03-01	0.00534829	0.273292	0.293333	0.00473392	-5.23098
2005-03-01	0.000730809		2002-12-01	0.00606267	0.267081	0.286667	0.00491347	-5.10561
2005-04-01	0.00163746		1997-08-01	0.00640033	0.26087	0.28	0.00510193	-5.05141
2005-05-01	0.00107435		1999-10-01	0.00687372	0.254658	0.273333	0.00529994	-4.98005
2005-06-01	0.000493241		1998-02-01	0.00698936	0.248447	0.266667	0.00550818	-4.96337
2005-07-01	8.35725e-05		1996-04-01	0.00777709	0.242236	0.26	0.00572742	-4.85657
2005-08-01	0.000313539		2006-04-01	0.00816829	0.236025	0.253333	0.00595847	-4.8075
2005-09-01	0.000434561		2004-05-01	0.00828033	0.229814	0.246667	0.00620226	-4.79387
2005-10-01	0.015044		2002-05-01	0.00844772	0.223602	0.24	0.0064598	-4.77386
2005-11-01	0.0091371		2006-01-01	0.00900396	0.217391	0.233333	0.00673222	-4.71009
2005-12-01	0.00389432		2003-03-01	0.0090894	0.21118	0.226667	0.00702075	-4.70065
2006-01-01	0.00900396		2005-11-01	0.0091371	0.204969	0.22	0.0073268	-4.69541
2006-02-01	0.0174229		2007-04-01	0.00934969	0.198758	0.213333	0.00765192	-4.67241
2006-03-01	0.0157892		2004-03-01	0.00937184	0.192547	0.206667	0.00799785	-4.67005
2006-04-01	0.00816829		2001-01-01	0.00986999	0.186335	0.2	0.00836655	-4.61826
2006-05-01	0.00191317		1995-09-01	0.0101541	0.180124	0.193333	0.00876024	-4.58988
2006-06-01	0.00040933		1997-06-01	0.0107118	0.173913	0.186667	0.00918143	-4.53641
2006-07-01	2.743e-06		2008-06-01	0.0107846	0.167702	0.18	0.00963298	-4.52964
2006-08-01	2.25549e-06		2003-11-01	0.0108058	0.161491	0.173333	0.0101182	-4.52768
2006-09-01	0.000280239		1997-02-01	0.0113069	0.15528	0.166667	0.0106408	-4.48235
2006-10-01	0.000147739		2002-11-01	0.0116997	0.149068	0.16	0.0112051	-4.44819
2006-11-01	4.75367e-05		2000-04-01	0.0119012	0.142857	0.153333	0.0118162	-4.43112
2006-12-01	0.000179849		1999-09-01	0.0119445	0.136646	0.146667	0.01248	-4.42748
2007-01-01	6.98157e-05		1996-02-01	0.0131196	0.130435	0.14	0.0132035	-4.33365
2007-02-01	0.000238381		2003-02-01	0.0138564	0.124224	0.133333	0.0139948	-4.27901
2007-03-01	0.000228817		1996-05-01	0.0138889	0.118012	0.126667	0.0148638	-4.27667
2007-04-01	0.00934969		1995-08-01	0.0139057	0.111801	0.12	0.0158224	-4.27546
2007-05-01	0.00390107		2004-04-01	0.0150407	0.10559	0.113333	0.0168848	-4.197
2007-06-01	0.000137644		2005-10-01	0.015044	0.0993789	0.106667	0.018069	-4.19678
2007-07-01	0		2003-12-01	0.01554	0.0931677	0.1	0.0193968	-4.16434
2007-08-01	0		2006-03-01	0.0157892	0.0869565	0.0933333	0.0208961	-4.14843
2007-09-01	0		2001-03-01	0.0161242	0.0807453	0.0866667	0.0226023	-4.12743
2007-10-01	0		1999-05-01	0.0165424	0.0745342	0.08	0.024562	-4.10183
2007-11-01	0		2006-02-01	0.0174229	0.068323	0.0733333	0.0268365	-4.04997
2007-12-01	0		2002-04-01	0.0192258	0.0621118	0.0666667	0.0295096	-3.9515
2008-01-01	0		2008-05-01	0.0192414	0.0559006	0.06	0.0326986	-3.95069
2008-02-01	7.00245e-05		2000-12-01	0.0210514	0.0496894	0.0533333	0.036573	-3.86079
2008-03-01	0		1999-11-01	0.0231878	0.0434783	0.0466667	0.0413883	-3.76413
2008-04-01	0.0027626		1997-12-01	0.0281673	0.0372671	0.04	0.0475505	-3.56959
2008-05-01	0.0192414		1996-12-01	0.0286117	0.0310559	0.0333333	0.0557498	-3.55394
2008-06-01	0.0107846		1997-01-01	0.0352237	0.0248447	0.0266667	0.0672727	-3.34604
2008-07-01	0.00194292		1996-11-01	0.0377314	0.0186335	0.02	0.0848645	-3.27726
2008-08-01	4.17622e-06		1995-12-01	0.0448624	0.0124224	0.0133333	0.115801	-3.10416
2008-09-01	0		1996-01-01	0.0696411	0.00621118	0.00666667	0.189753	-2.6644

## Sheet: Hyporheic
Can Vila (Vallcebre)	Oct	Nov	Dec	Jan	Feb	Mar	Apr	May	Jun	Jul	Aug	Sep
1994/1995	-	-	-	-	-	-	-	-	0	0	0	0
1995/1996	0	0	0	0	0	0	0	0	0	0	0	0
1996/1997	0	0	0	0	0	0	0	0	0	0	0	0
1997/1998	0	0	0	0	0	0	0	0	0	0	0	0
1998/1999	0	0	0	0	0	0	0	0	0	0	0	0
1999/2000	0	0	0	0	0	0	0	0	0	0	1	0
2000/2001	0	0	0	0	0	0	0	0	0	0	1	0
2001/2002	0	0	0	0	0	0	0	0	0	0	0	0
2002/2003	0	0	0	0	0	0	0	0	0	0	1	0
2003/2004	0	0	0	0	0	0	0	0	0	0	0	0
2004/2005	0	0	0	0	0	0	0	0	0	0	0	0
2005/2006	0	0	0	0	0	0	0	0	0	1	1	0
2006/2007	0	1	0	0	0	0	0	0	0	1	1	1
2007/2008	1	1	1	1	0	1	0	0	0	0	1	1
0	-	-	-	-	-	-	-	-	-	-	-	-
0	-	-	-	-	-	-	-	-	-	-	-	-
0	-	-	-	-	-	-	-	-	-	-	-	-
0	-	-	-	-	-	-	-	-	-	-	-	-
0	-	-	-	-	-	-	-	-	-	-	-	-
0	-	-	-	-	-	-	-	-	-	-	-	-
0	-	-	-	-	-	-	-	-	-	-	-	-
0	-	-	-	-	-	-	-	-	-	-	-	-
0	-	-	-	-	-	-	-	-	-	-	-	-
0	-	-	-	-	-	-	-	-	-	-	-	-
0	-	-	-	-	-	-	-	-	-	-	-	-
0	-	-	-	-	-	-	-	-	-	-	-	-
0	-	-	-	-	-	-	-	-	-	-	-	-
0	-	-	-	-	-	-	-	-	-	-	-	-
0	-	-	-	-	-	-	-	-	-	-	-	-
0	-	-	-	-	-	-	-	-	-	-	-	-
0	-	-	-	-	-	-	-	-	-	-	-	-
0	-	-	-	-	-	-	-	-	-	-	-	-
0	-	-	-	-	-	-	-	-	-	-	-	-
0	-	-	-	-	-	-	-	-	-	-	-	-
0	-	-	-	-	-	-	-	-	-	-	-	-
0	-	-	-	-	-	-	-	-	-	-	-	-
0	-	-	-	-	-	-	-	-	-	-	-	-
0	-	-	-	-	-	-	-	-	-	-	-	-
0	-	-	-	-	-	-	-	-	-	-	-	-
0	-	-	-	-	-	-	-	-	-	-	-	-
0	-	-	-	-	-	-	-	-	-	-	-	-
Freq	0.0769231	0.153846	0.0769231	0.0769231	0	0.0769231	0	0	0	0.142857	0.428571	0.142857
													0.0979853
	0.646154	0.486111	0.244186	0.150538	0.229885	1.22917
	1.54762	2.05714	4.09524	6.64286	4.35	0.813559
Mf=	0.902015
Sd6=	0.849462

## Sheet: Arheic
Can Vila (Vallcebre)	Oct	Nov	Dec	Jan	Feb	Mar	Apr	May	Jun	Jul	Aug	Sep
1994/1995	-	-	-	-	-	-	-	-	0	0	0	0
1995/1996	0	0	0	0	0	0	0	0	0	0	0	0
1996/1997	0	0	0	0	0	0	0	0	0	0	0	0
1997/1998	0	0	0	0	0	0	0	0	0	1	1	1
1998/1999	0	1	0	0	0	0	0	0	0	1	0	0
1999/2000	0	0	0	0	0	0	0	0	0	1	0	0
2000/2001	0	0	0	0	0	0	0	0	0	1	0	1
2001/2002	1	0	0	0	0	0	0	0	0	1	1	0
2002/2003	0	0	0	0	0	0	0	0	1	0	0	1
2003/2004	0	0	0	0	0	0	0	0	0	1	0	0
2004/2005	0	0	0	0	1	0	0	0	0	1	1	0
2005/2006	0	0	0	0	0	0	0	0	0	0	0	1
2006/2007	1	0	1	1	1	1	0	0	1	0	0	0
2007/2008	0	0	0	0	1	0	0	0	0	0	0	0
0	-	-	-	-	-	-	-	-	-	-	-	-
0	-	-	-	-	-	-	-	-	-	-	-	-
0	-	-	-	-	-	-	-	-	-	-	-	-
0	-	-	-	-	-	-	-	-	-	-	-	-
0	-	-	-	-	-	-	-	-	-	-	-	-
0	-	-	-	-	-	-	-	-	-	-	-	-
0	-	-	-	-	-	-	-	-	-	-	-	-
0	-	-	-	-	-	-	-	-	-	-	-	-
0	-	-	-	-	-	-	-	-	-	-	-	-
0	-	-	-	-	-	-	-	-	-	-	-	-
0	-	-	-	-	-	-	-	-	-	-	-	-
0	-	-	-	-	-	-	-	-	-	-	-	-
0	-	-	-	-	-	-	-	-	-	-	-	-
0	-	-	-	-	-	-	-	-	-	-	-	-
0	-	-	-	-	-	-	-	-	-	-	-	-
0	-	-	-	-	-	-	-	-	-	-	-	-
0	-	-	-	-	-	-	-	-	-	-	-	-
0	-	-	-	-	-	-	-	-	-	-	-	-
0	-	-	-	-	-	-	-	-	-	-	-	-
0	-	-	-	-	-	-	-	-	-	-	-	-
0	-	-	-	-	-	-	-	-	-	-	-	-
0	-	-	-	-	-	-	-	-	-	-	-	-
0	-	-	-	-	-	-	-	-	-	-	-	-
0	-	-	-	-	-	-	-	-	-	-	-	-
0	-	-	-	-	-	-	-	-	-	-	-	-
0	-	-	-	-	-	-	-	-	-	-	-	-
0	-	-	-	-	-	-	-	-	-	-	-	-
Freq	0.153846	0.0769231	0.0769231	0.0769231	0.230769	0.0769231	0	0	0.142857	0.5	0.214286	0.285714
													0.15293

## Sheet: Oligorheic
Can Vila (Vallcebre)	Oct	Nov	Dec	Jan	Feb	Mar	Apr	May	Jun	Jul	Aug	Sep
1994/1995	-	-	-	-	-	-	-	-	0	0	0	0
1995/1996	0	0	0	0	0	0	0	0	0	1	1	1
1996/1997	0	0	0	0	0	0	0	0	0	0	0	0
1997/1998	1	0	0	0	0	0	0	0	0	0	0	0
1998/1999	1	0	0	0	0	0	0	0	0	0	1	0
1999/2000	0	0	0	0	1	1	0	0	1	0	0	1
2000/2001	1	0	0	0	0	0	0	0	0	0	0	0
2001/2002	0	0	1	0	1	0	0	0	0	0	0	1
2002/2003	0	0	0	0	0	0	0	0	0	1	0	0
2003/2004	0	0	0	0	0	0	0	0	0	0	0	1
2004/2005	1	1	0	1	0	1	0	0	1	0	0	1
2005/2006	0	0	0	0	0	0	0	0	1	0	0	0
2006/2007	0	0	0	0	0	0	0	0	0	0	0	0
2007/2008	0	0	0	0	0	0	0	0	0	0	0	0
0	-	-	-	-	-	-	-	-	-	-	-	-
0	-	-	-	-	-	-	-	-	-	-	-	-
0	-	-	-	-	-	-	-	-	-	-	-	-
0	-	-	-	-	-	-	-	-	-	-	-	-
0	-	-	-	-	-	-	-	-	-	-	-	-
0	-	-	-	-	-	-	-	-	-	-	-	-
0	-	-	-	-	-	-	-	-	-	-	-	-
0	-	-	-	-	-	-	-	-	-	-	-	-
0	-	-	-	-	-	-	-	-	-	-	-	-
0	-	-	-	-	-	-	-	-	-	-	-	-
0	-	-	-	-	-	-	-	-	-	-	-	-
0	-	-	-	-	-	-	-	-	-	-	-	-
0	-	-	-	-	-	-	-	-	-	-	-	-
0	-	-	-	-	-	-	-	-	-	-	-	-
0	-	-	-	-	-	-	-	-	-	-	-	-
0	-	-	-	-	-	-	-	-	-	-	-	-
0	-	-	-	-	-	-	-	-	-	-	-	-
0	-	-	-	-	-	-	-	-	-	-	-	-
0	-	-	-	-	-	-	-	-	-	-	-	-
0	-	-	-	-	-	-	-	-	-	-	-	-
0	-	-	-	-	-	-	-	-	-	-	-	-
0	-	-	-	-	-	-	-	-	-	-	-	-
0	-	-	-	-	-	-	-	-	-	-	-	-
0	-	-	-	-	-	-	-	-	-	-	-	-
0	-	-	-	-	-	-	-	-	-	-	-	-
0	-	-	-	-	-	-	-	-	-	-	-	-
0	-	-	-	-	-	-	-	-	-	-	-	-
Freq	0.307692	0.0769231	0.0769231	0.0769231	0.153846	0.153846	0	0	0.214286	0.142857	0.142857	0.357143
													0.141941

## Sheet: Eurheic
Can Vila (Vallcebre)	Oct	Nov	Dec	Jan	Feb	Mar	Apr	May	Jun	Jul	Aug	Sep
1994/1995	-	-	-	-	-	-	-	-	1	1	1	1
1995/1996	1	1	0	0	1	1	1	1	1	0	0	0
1996/1997	1	0	0	0	1	1	1	1	1	1	1	1
1997/1998	0	1	0	1	1	1	1	1	1	0	0	0
1998/1999	0	0	1	1	1	1	1	1	1	0	0	1
1999/2000	1	0	1	1	0	0	1	1	0	0	0	0
2000/2001	0	1	0	1	1	1	1	1	1	0	0	0
2001/2002	0	1	0	1	0	1	1	1	1	0	0	0
2002/2003	1	1	1	1	1	1	1	1	0	0	0	0
2003/2004	1	1	1	1	1	1	1	1	1	0	1	0
2004/2005	0	0	1	0	0	0	1	1	0	0	0	0
2005/2006	1	1	1	1	1	1	1	1	0	0	0	0
2006/2007	0	0	0	0	0	0	1	1	0	0	0	0
2007/2008	0	0	0	0	0	0	1	1	1	1	0	0
0	-	-	-	-	-	-	-	-	-	-	-	-
0	-	-	-	-	-	-	-	-	-	-	-	-
0	-	-	-	-	-	-	-	-	-	-	-	-
0	-	-	-	-	-	-	-	-	-	-	-	-
0	-	-	-	-	-	-	-	-	-	-	-	-
0	-	-	-	-	-	-	-	-	-	-	-	-
0	-	-	-	-	-	-	-	-	-	-	-	-
0	-	-	-	-	-	-	-	-	-	-	-	-
0	-	-	-	-	-	-	-	-	-	-	-	-
0	-	-	-	-	-	-	-	-	-	-	-	-
0	-	-	-	-	-	-	-	-	-	-	-	-
0	-	-	-	-	-	-	-	-	-	-	-	-
0	-	-	-	-	-	-	-	-	-	-	-	-
0	-	-	-	-	-	-	-	-	-	-	-	-
0	-	-	-	-	-	-	-	-	-	-	-	-
0	-	-	-	-	-	-	-	-	-	-	-	-
0	-	-	-	-	-	-	-	-	-	-	-	-
0	-	-	-	-	-	-	-	-	-	-	-	-
0	-	-	-	-	-	-	-	-	-	-	-	-
0	-	-	-	-	-	-	-	-	-	-	-	-
0	-	-	-	-	-	-	-	-	-	-	-	-
0	-	-	-	-	-	-	-	-	-	-	-	-
0	-	-	-	-	-	-	-	-	-	-	-	-
0	-	-	-	-	-	-	-	-	-	-	-	-
0	-	-	-	-	-	-	-	-	-	-	-	-
0	-	-	-	-	-	-	-	-	-	-	-	-
0	-	-	-	-	-	-	-	-	-	-	-	-
Freq	0.461538	0.538462	0.461538	0.615385	0.615385	0.692308	1	1	0.642857	0.214286	0.214286	0.214286
													0.555861

## Sheet: Hyperrheic
Can Vila (Vallcebre)	Oct	Nov	Dec	Jan	Feb	Mar	Apr	May	Jun	Jul	Aug	Sep
1994/1995	-	-	-	-	-	-	-	-	0	0	0	0
1995/1996	0	0	1	1	0	0	0	0	0	0	0	0
1996/1997	0	1	1	1	0	0	0	0	0	0	0	0
1997/1998	0	0	1	0	0	0	0	0	0	0	0	0
1998/1999	0	0	0	0	0	0	0	0	0	0	0	0
1999/2000	0	1	0	0	0	0	0	0	0	0	0	0
2000/2001	0	0	1	0	0	0	0	0	0	0	0	0
2001/2002	0	0	0	0	0	0	0	0	0	0	0	0
2002/2003	0	0	0	0	0	0	0	0	0	0	0	0
2003/2004	0	0	0	0	0	0	0	0	0	0	0	0
2004/2005	0	0	0	0	0	0	0	0	0	0	0	0
2005/2006	0	0	0	0	0	0	0	0	0	0	0	0
2006/2007	0	0	0	0	0	0	0	0	0	0	0	0
2007/2008	0	0	0	0	0	0	0	0	0	0	0	0
0	-	-	-	-	-	-	-	-	-	-	-	-
0	-	-	-	-	-	-	-	-	-	-	-	-
0	-	-	-	-	-	-	-	-	-	-	-	-
0	-	-	-	-	-	-	-	-	-	-	-	-
0	-	-	-	-	-	-	-	-	-	-	-	-
0	-	-	-	-	-	-	-	-	-	-	-	-
0	-	-	-	-	-	-	-	-	-	-	-	-
0	-	-	-	-	-	-	-	-	-	-	-	-
0	-	-	-	-	-	-	-	-	-	-	-	-
0	-	-	-	-	-	-	-	-	-	-	-	-
0	-	-	-	-	-	-	-	-	-	-	-	-
0	-	-	-	-	-	-	-	-	-	-	-	-
0	-	-	-	-	-	-	-	-	-	-	-	-
0	-	-	-	-	-	-	-	-	-	-	-	-
0	-	-	-	-	-	-	-	-	-	-	-	-
0	-	-	-	-	-	-	-	-	-	-	-	-
0	-	-	-	-	-	-	-	-	-	-	-	-
0	-	-	-	-	-	-	-	-	-	-	-	-
0	-	-	-	-	-	-	-	-	-	-	-	-
0	-	-	-	-	-	-	-	-	-	-	-	-
0	-	-	-	-	-	-	-	-	-	-	-	-
0	-	-	-	-	-	-	-	-	-	-	-	-
0	-	-	-	-	-	-	-	-	-	-	-	-
0	-	-	-	-	-	-	-	-	-	-	-	-
0	-	-	-	-	-	-	-	-	-	-	-	-
0	-	-	-	-	-	-	-	-	-	-	-	-
0	-	-	-	-	-	-	-	-	-	-	-	-
Freq	0	0.153846	0.307692	0.153846	0	0	0	0	0	0	0	0
													0.0512821

[truncated: 1 more sheets: Aquatic states frequency graph]
